# Supplementary material for: Holmium-Containing Metal-Organic Frameworks as Modifiers for PEBA-Based Membranes
Source: MDPI journal article supplement (doi:10.3390/polym15183834), 2023-09-20
Supplement: s1 [file s1]

# Holmium-containing metal-organic frameworks as modifiers for PEBA-based membranes

Anna Kuzminova <sup>1</sup>, Mariia Dmitrenko <sup>1</sup>, Kirill Salomatin <sup>1</sup>, Olga Vezo <sup>1</sup>, Sergey Kirichenko <sup>1</sup>, Semyon Egorov <sup>1</sup>, Marina Bezrukova <sup>2</sup>, Anna Karyakina <sup>1</sup>, Alexey Eremin <sup>2</sup>, Ekaterina Popova <sup>2,3,4</sup>, Anastasia Penkova <sup>1</sup>, and Artem Selyutin <sup>1,\*</sup>

<sup>1</sup> Saint-Petersburg State University, 7/9 Universitetskaya Emb., Saint-Petersburg, 199034, Russia

<sup>2</sup> Institute of Macromolecular Compounds, Russian Academy of Sciences, 31 Bolshoy pr., St. Petersburg 199004, Russia

<sup>3</sup> Saint-Petersburg State Institute of Technology (Technical University), 24-26/49 letter A Moskovski ave., St. Petersburg 190013, Russia

<sup>4</sup> Saint-Petersburg State Chemical Pharmaceutical University, 14 Akad. Popova st., St. Petersburg 197022, Russia

\* Correspondence: a.selyutin@spbu.ru ; selutin@inbox.ru

## S1. Materials

Figure S1 shows the ligands that have been used to synthesize metal-organic frameworks based on holmium.

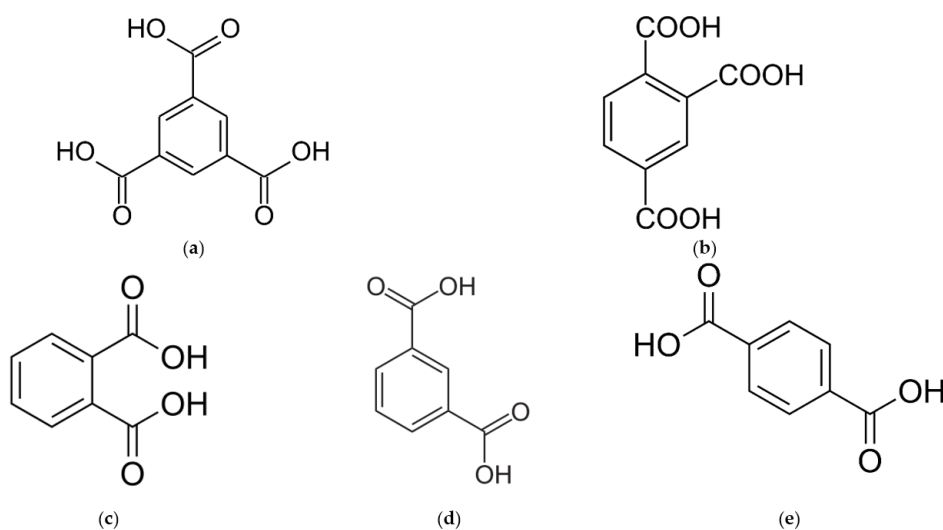

**Figure S1.** Structural formula of ligands (a) 1,3,5-H<sub>3</sub>btc; (b) 1,2,4-H<sub>3</sub>btc; (c) 1,2-H<sub>2</sub>bdc; (d) 1,3-H<sub>2</sub>bdc; (e) 1,4-H<sub>2</sub>bdc.

Table S1 shows characteristics of dyes, such as structural formula, molecular weight, maximum absorption wavelength.

**Table S1.** Structural formula, molecular weight, maximum absorption wavelength of the dyes used.

| Dye                 | Structural formula                                                                   | Molecular weight, g/mol | Maximum absorption wavelength, nm |
|---------------------|--------------------------------------------------------------------------------------|-------------------------|-----------------------------------|
| Congo Red dye       | 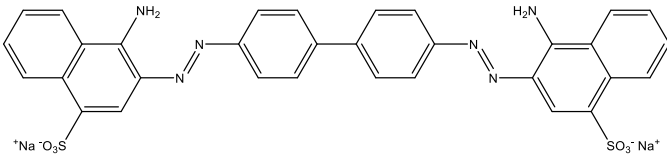   | 696.67                  | 500                               |
| Fuchsin             |   | 290.32                  | 550                               |
| Glycine thymol blue |  | 640.74                  | 600                               |
| Methylene blue      |  | 319.85                  | 555                               |
| Eriochrome Black T  |  | 461.38                  | 540                               |

## S2. Ho-MOFs Investigation

Shifted powder diffraction patterns for Ho-1,4-H<sub>2</sub>bdc, Ho-1,3-H<sub>2</sub>bdc, and Ho-1,3,5-H<sub>3</sub>btc are presented in Figure S2.

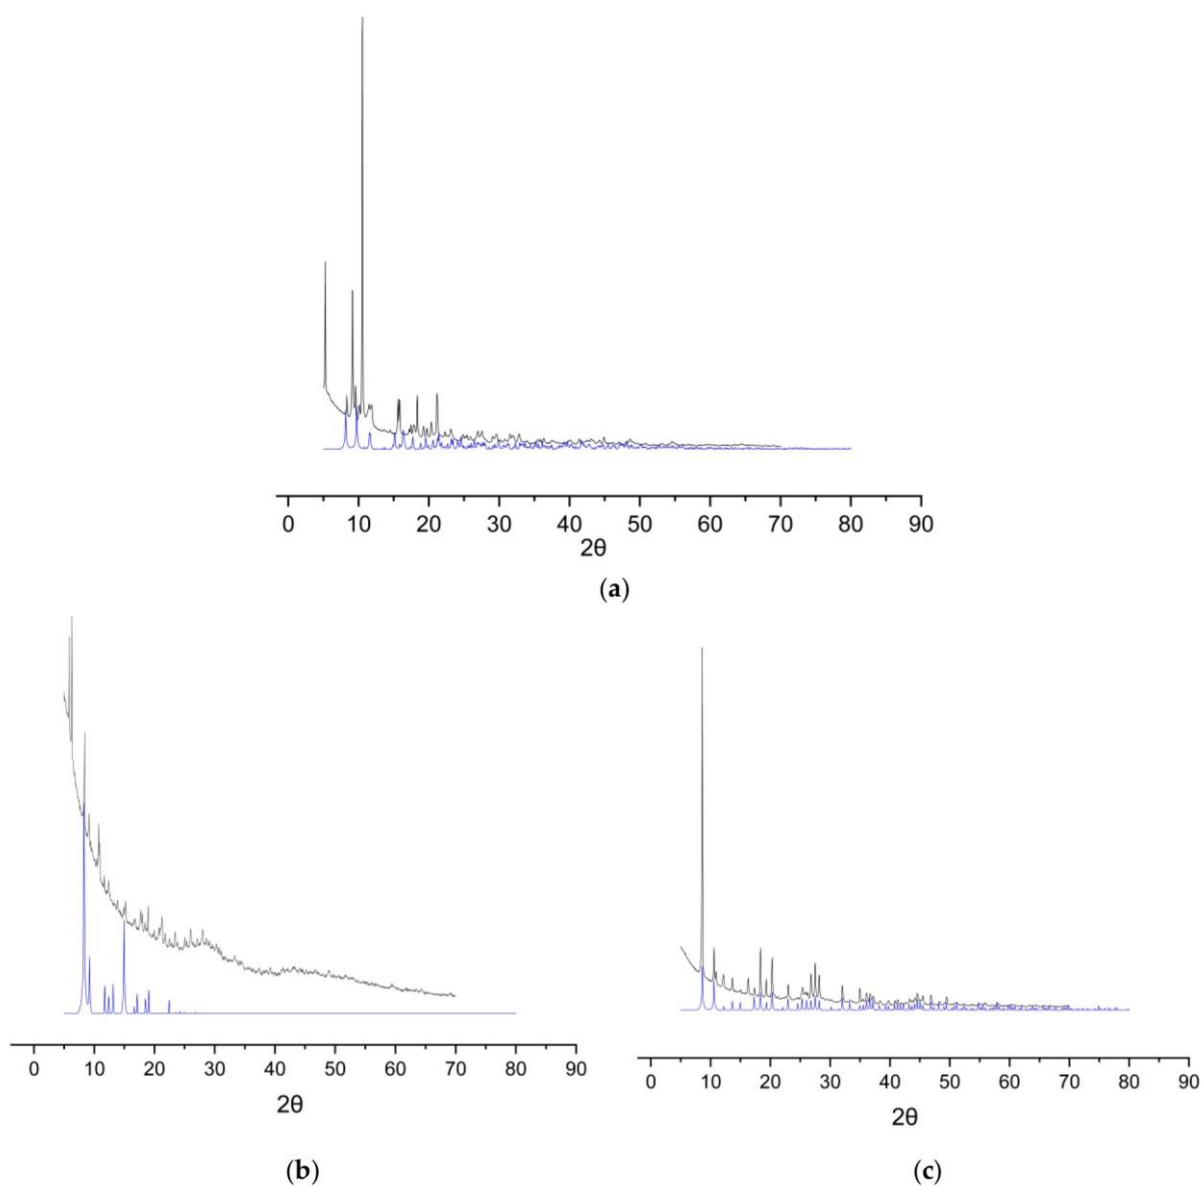

**Figure S2.** Shifted powder diffraction patterns for (a) Ho-1,4-H<sub>2</sub>bdc (black line, synthesized in this work) and Y-1,4-H<sub>2</sub>bdc (blue line, simulated from *cif*-file [1]); (b) Ho-1,3-H<sub>2</sub>bdc (black line, synthesized in this work) and Al-1,3-H<sub>2</sub>bdc (blue line, simulated from *cif*-file [2]); (c) Ho-1,3,5-H<sub>3</sub>btc (black line, synthesized in this work) and Ho-1,3,5-H<sub>3</sub>btc (blue line, simulated from *cif*-file [3]).

The structures of the synthesized MOFs are shown in Figure S3.

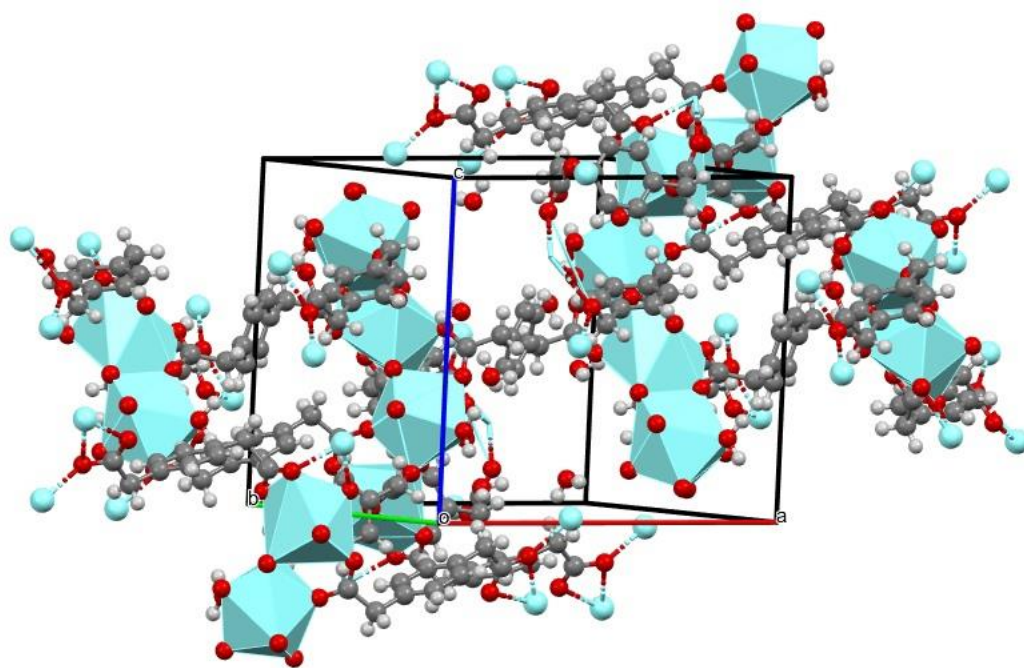

(a)

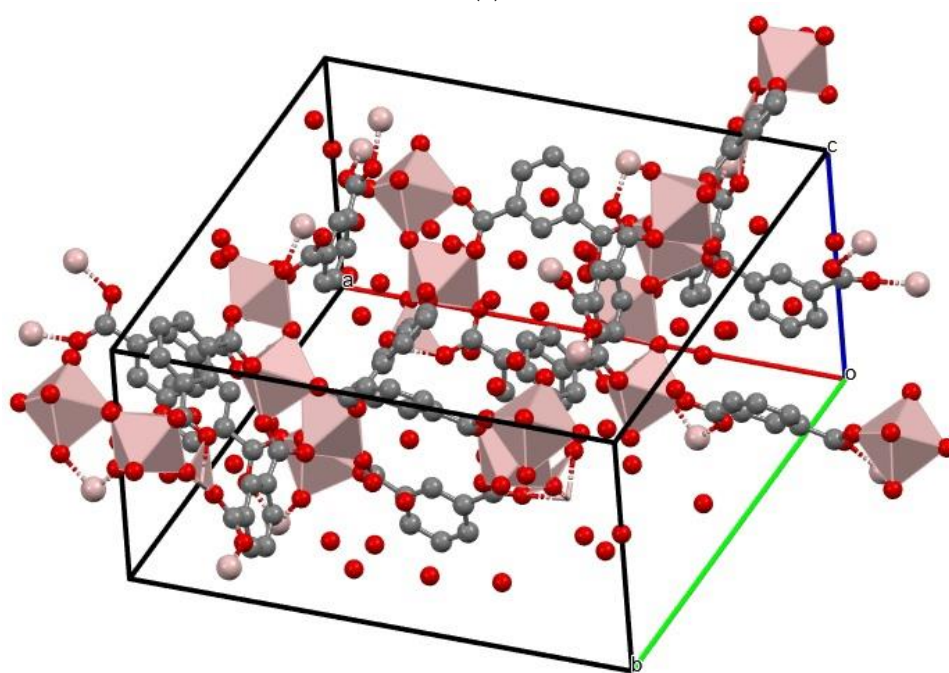

(b)

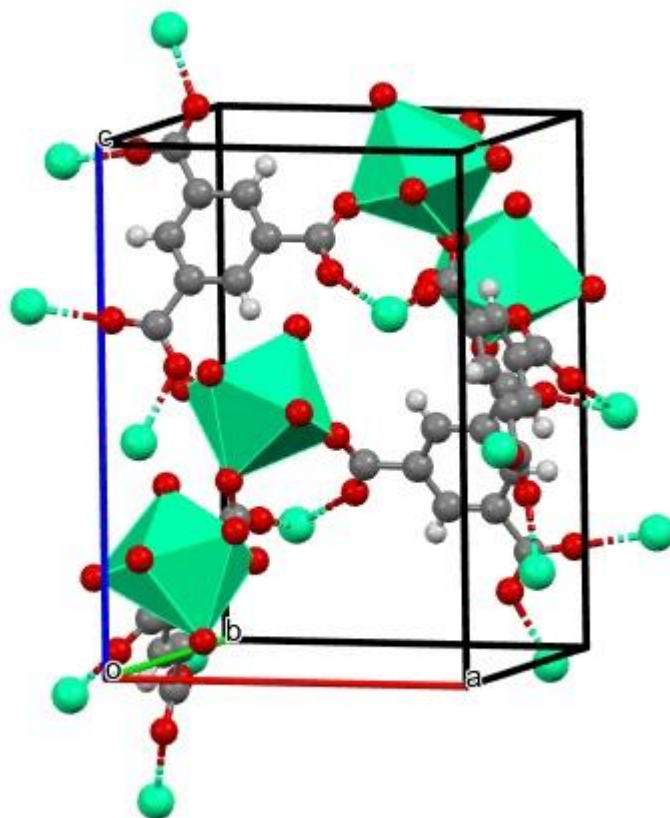

(c)

**Figure S3.** Structure of (a) Ho-1,4-H<sub>2</sub>bdc simulated from *cif*-file [1], (b) Ho-1,3-H<sub>2</sub>bdc simulated from *cif*-file [2], (c) Ho-1,3,5-H<sub>3</sub>btc simulated from *cif*-file [2].

Scanning electron microscopy (SEM) with additional energy dispersive elemental analysis (EDX) was performed on the synthesized Ho-MOFs. Figure S4 shows the EDX spectra for SEM micrographs (presented in Figure 2) of Ho-1,3,5-H<sub>3</sub>btc MOF. Figure S5 shows the EDX spectra for SEM micrographs (presented in Figure 2) of Ho-1,2,4-H<sub>3</sub>btc MOF. Figure S6 shows the EDX spectra for SEM micrographs (presented in Figure 2) of Ho-1,2-H<sub>2</sub>bdc MOF. Figure S7 shows the EDX spectra for SEM micrographs (presented in Figure 2) of Ho-1,3-H<sub>2</sub>bdc MOF. Figure S8 shows the EDX spectra for SEM micrographs (presented in Figure 2) of Ho-1,4-H<sub>2</sub>bdc MOF.

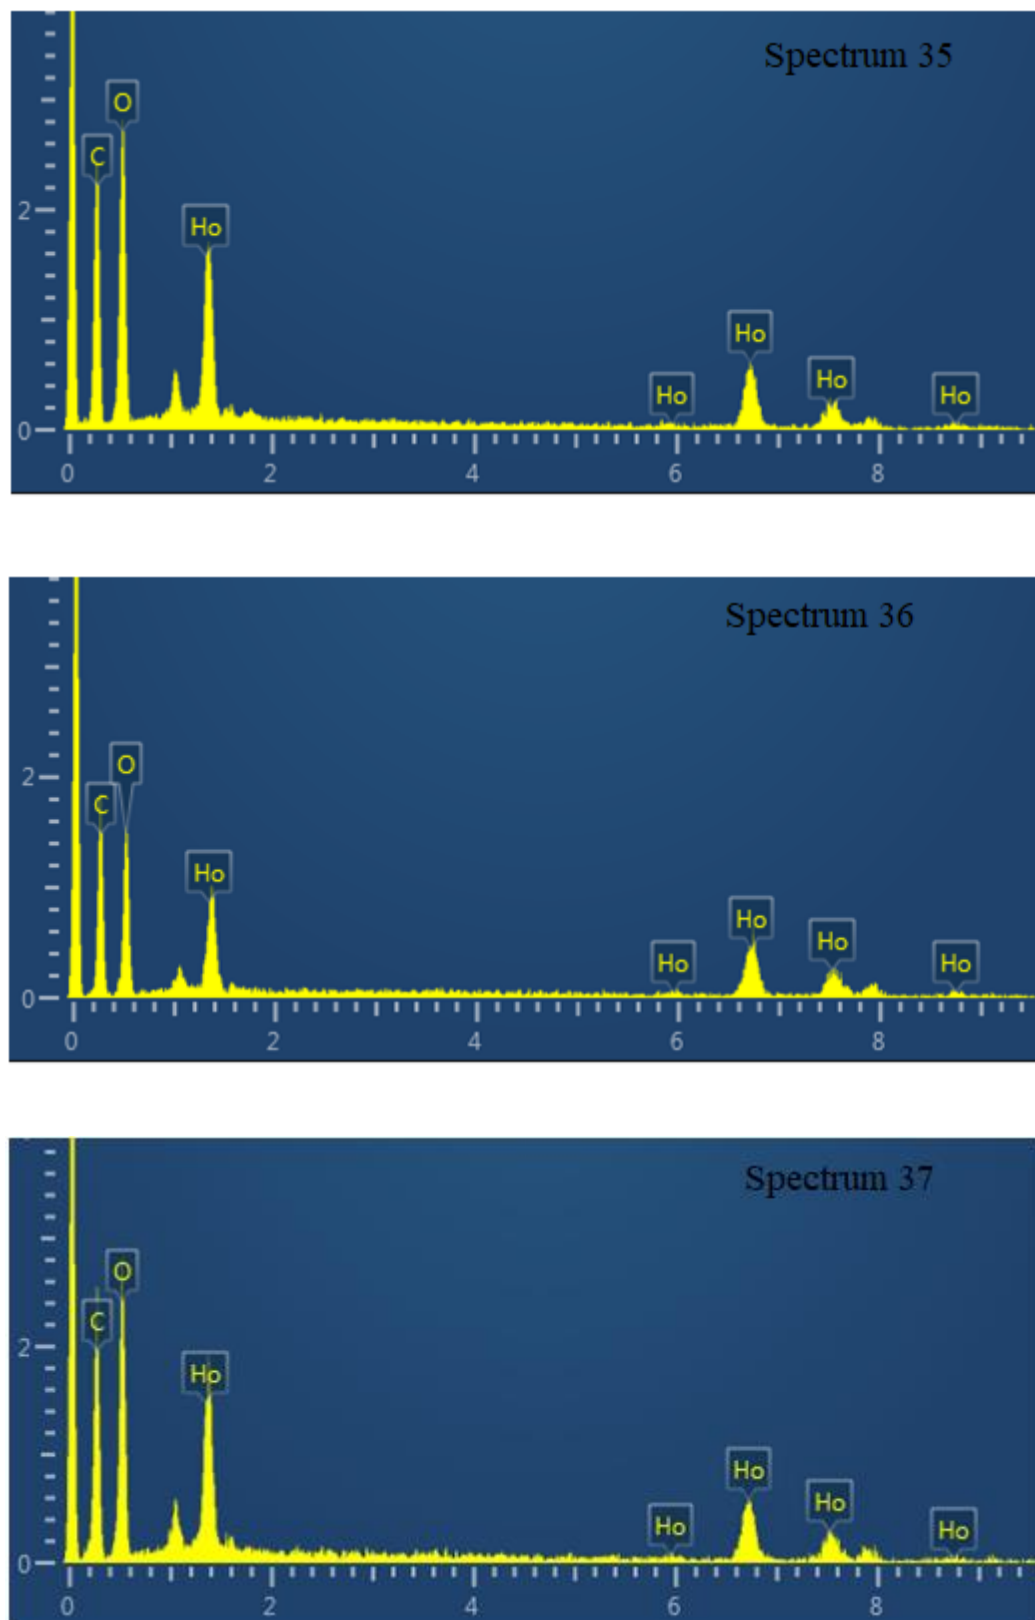

**Figure S4.** EDX spectra for SEM micrographs (presented in Figure 2) of Ho-1,3,5-H<sub>3</sub>btc MOF.

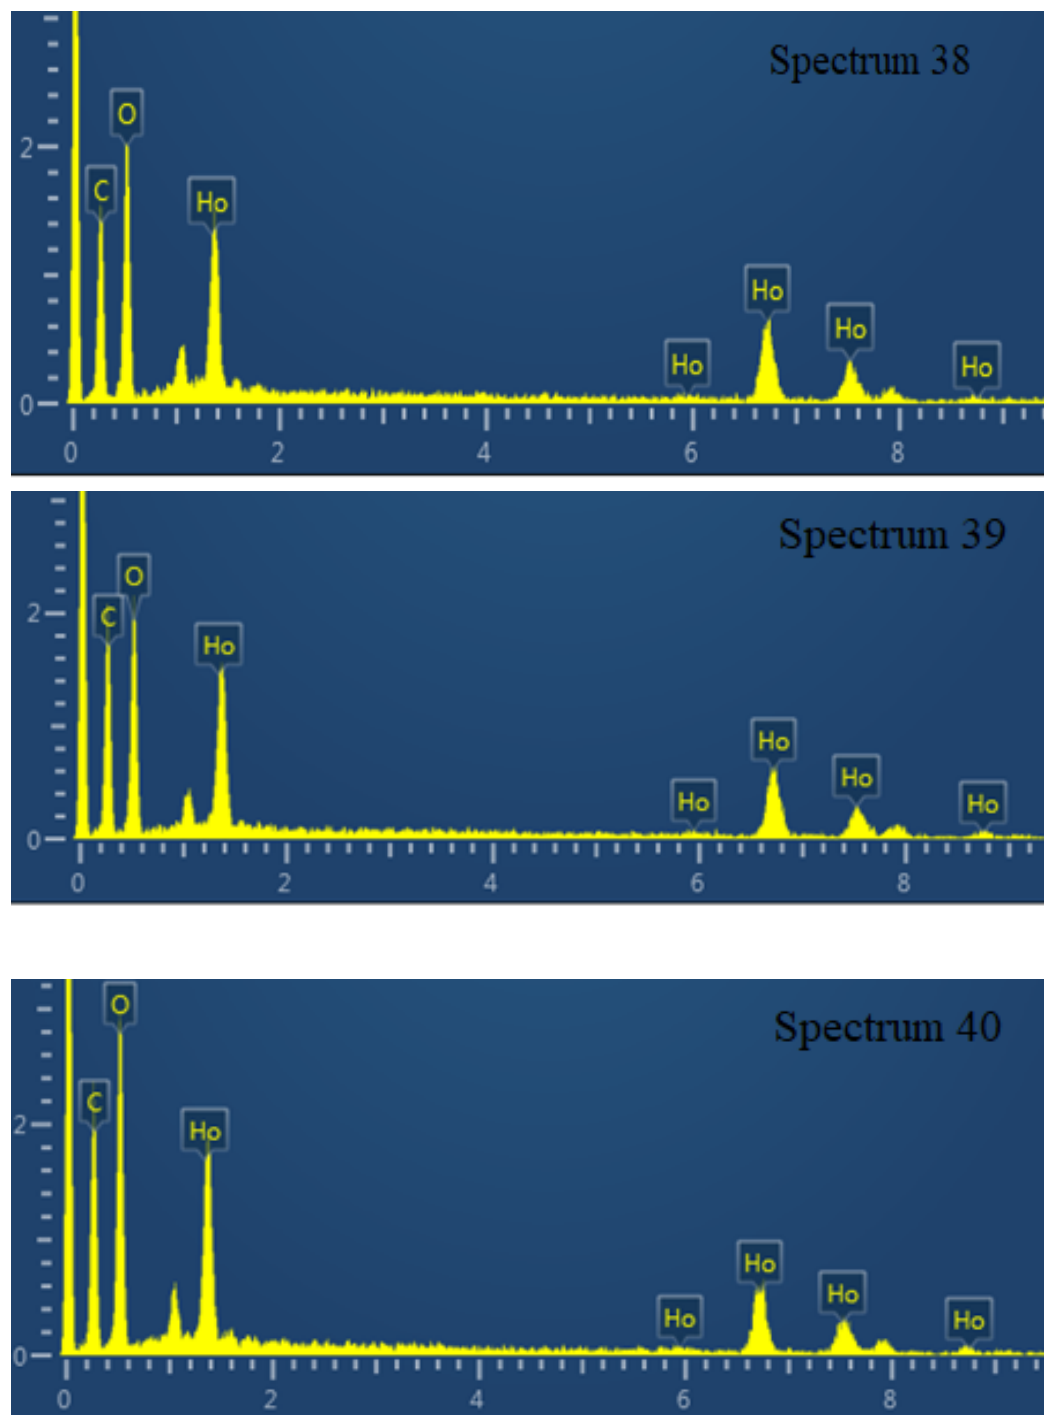

**Figure S5.** EDX spectra for SEM micrographs (presented in Figure 2) of Ho-1,2,4-H<sub>3</sub>btc MOF.

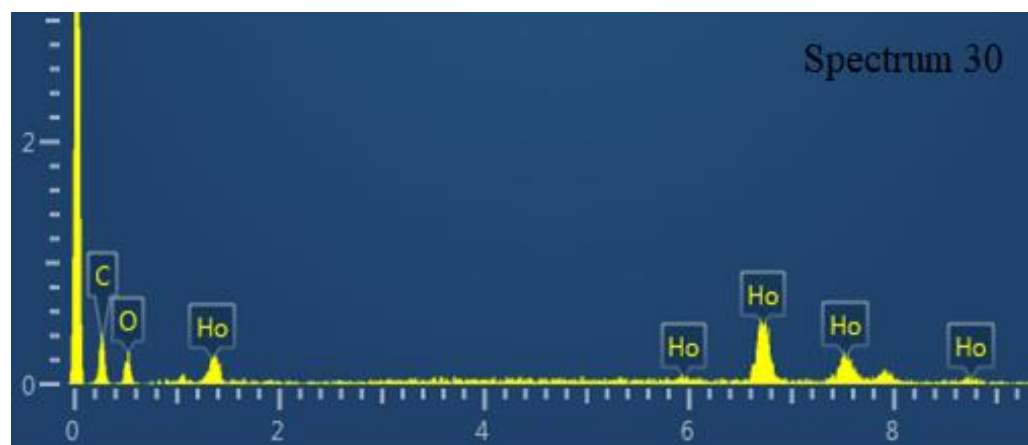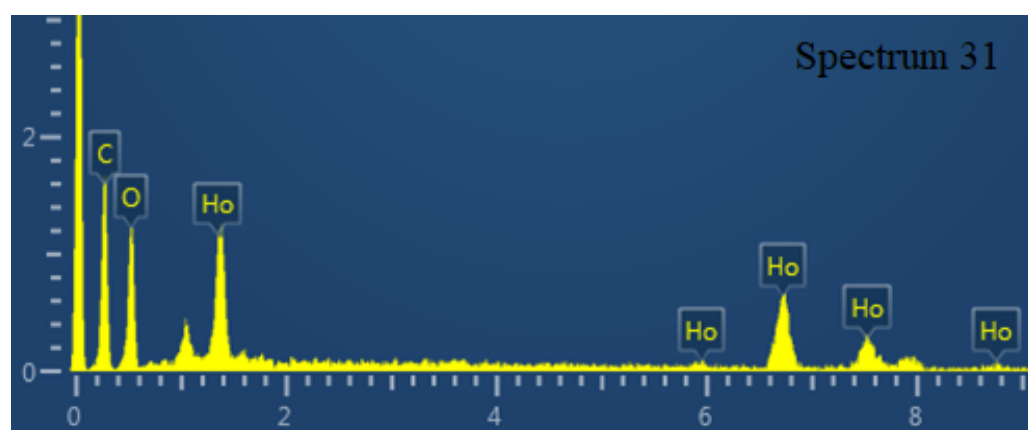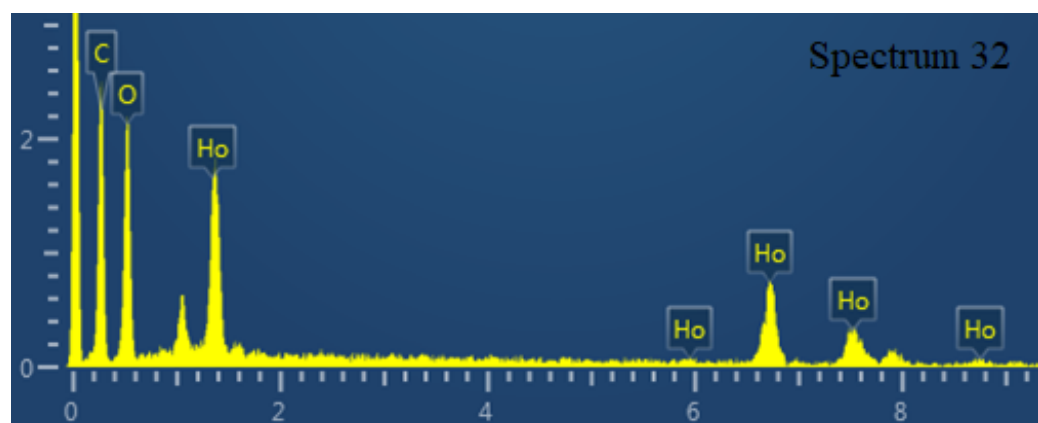



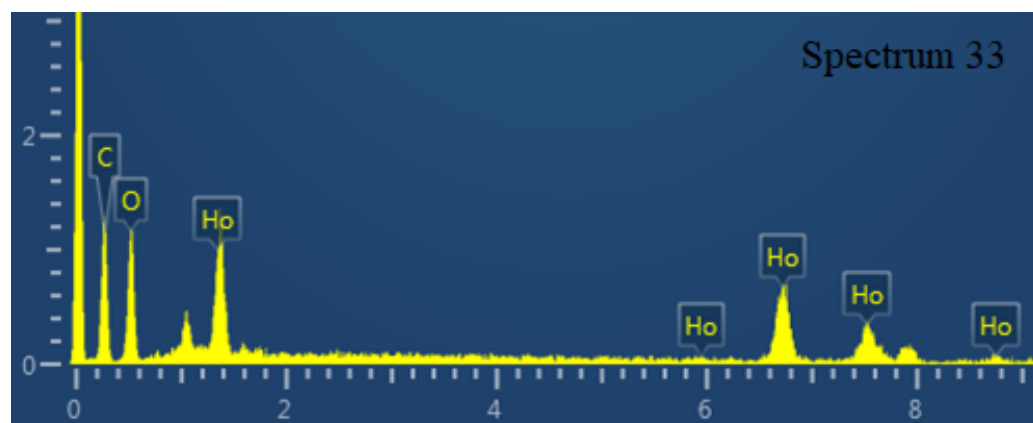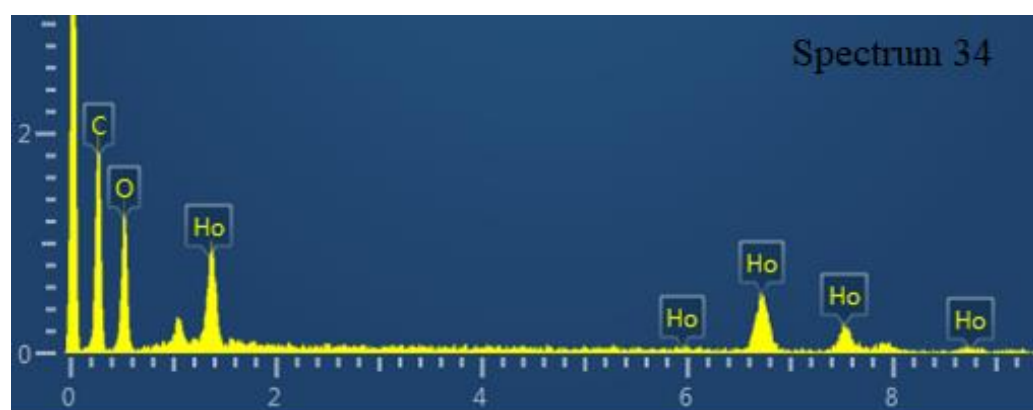

**Figure S6.** EDX spectra for SEM micrographs (presented in Figure 2) of Ho-1,2-H<sub>2</sub>bdc MOF.

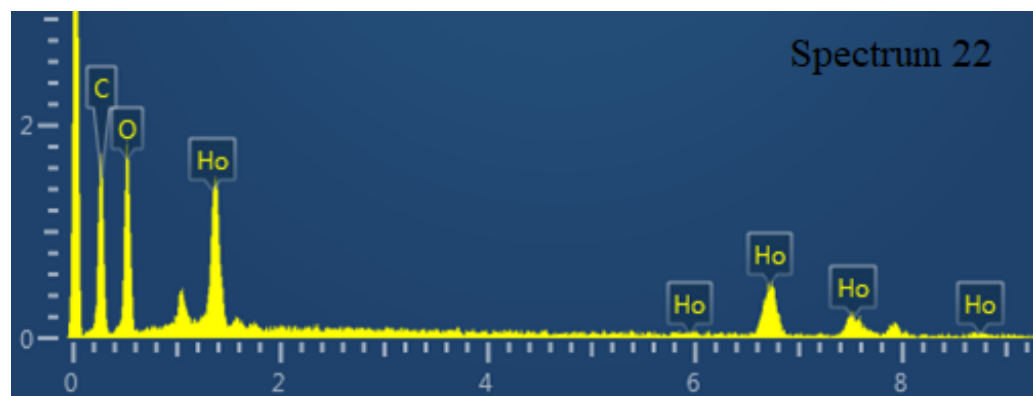

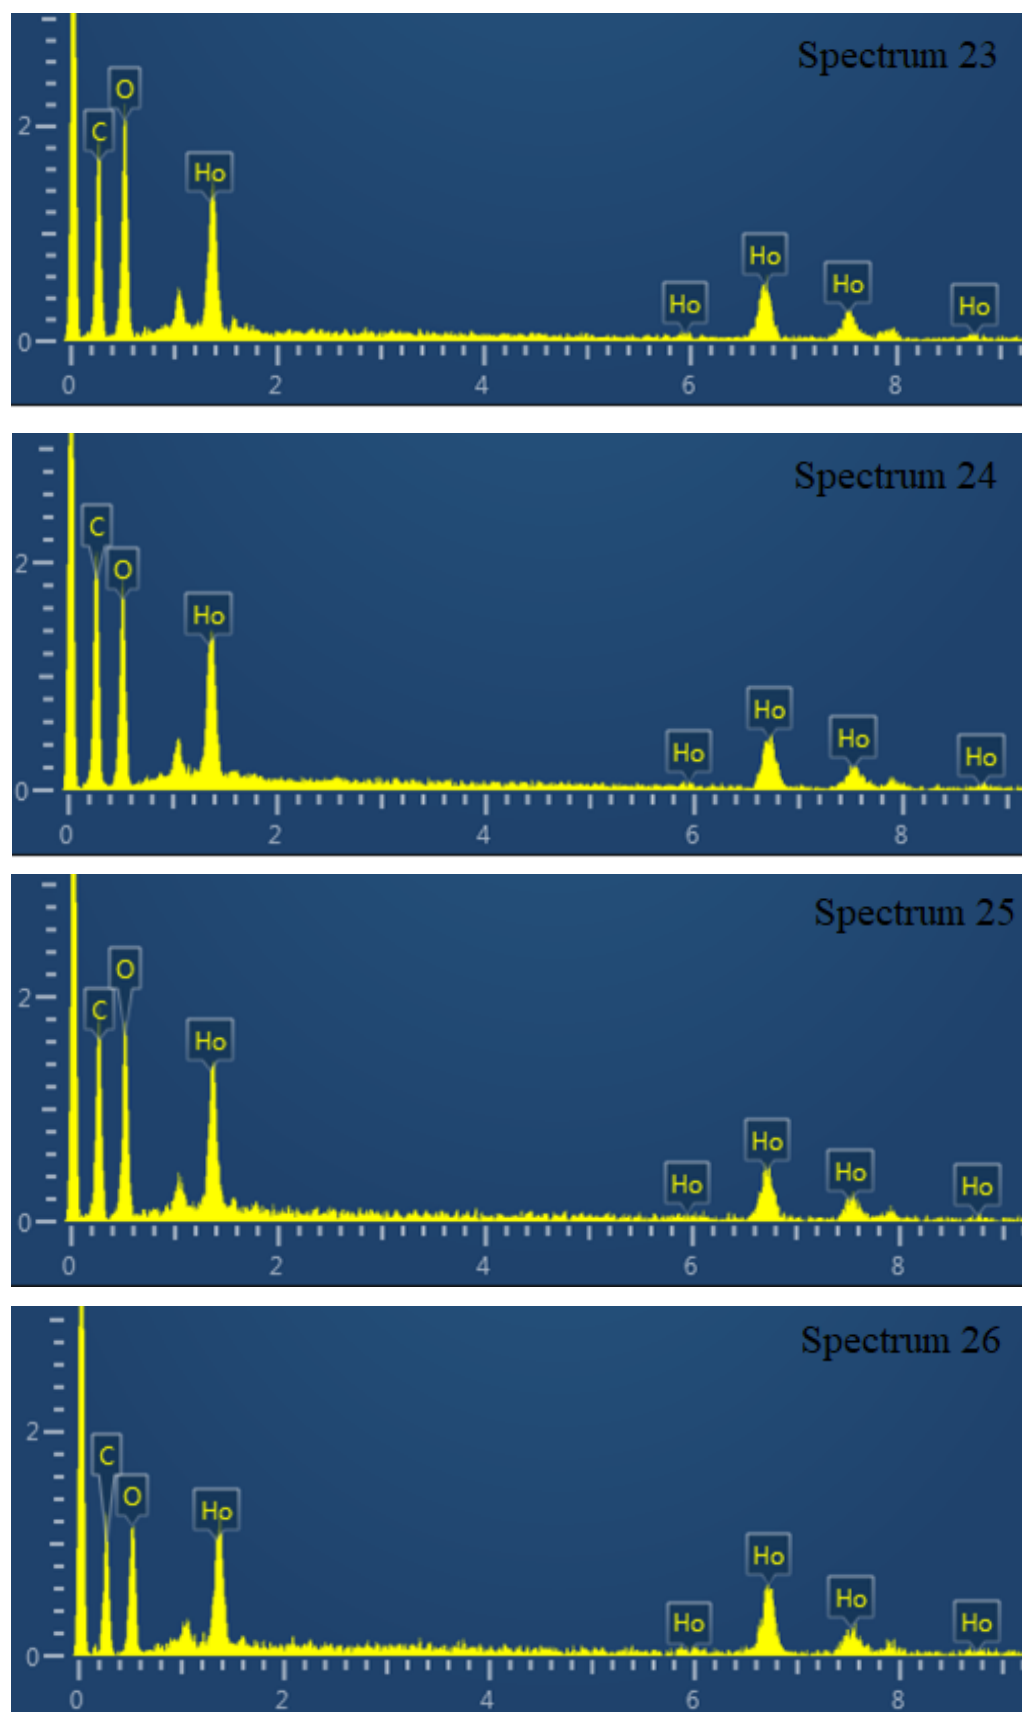

**Figure S7.** EDX spectra for SEM micrographs (presented in Figure 2) of Ho-1,3-H<sub>2</sub>bdc MOF.

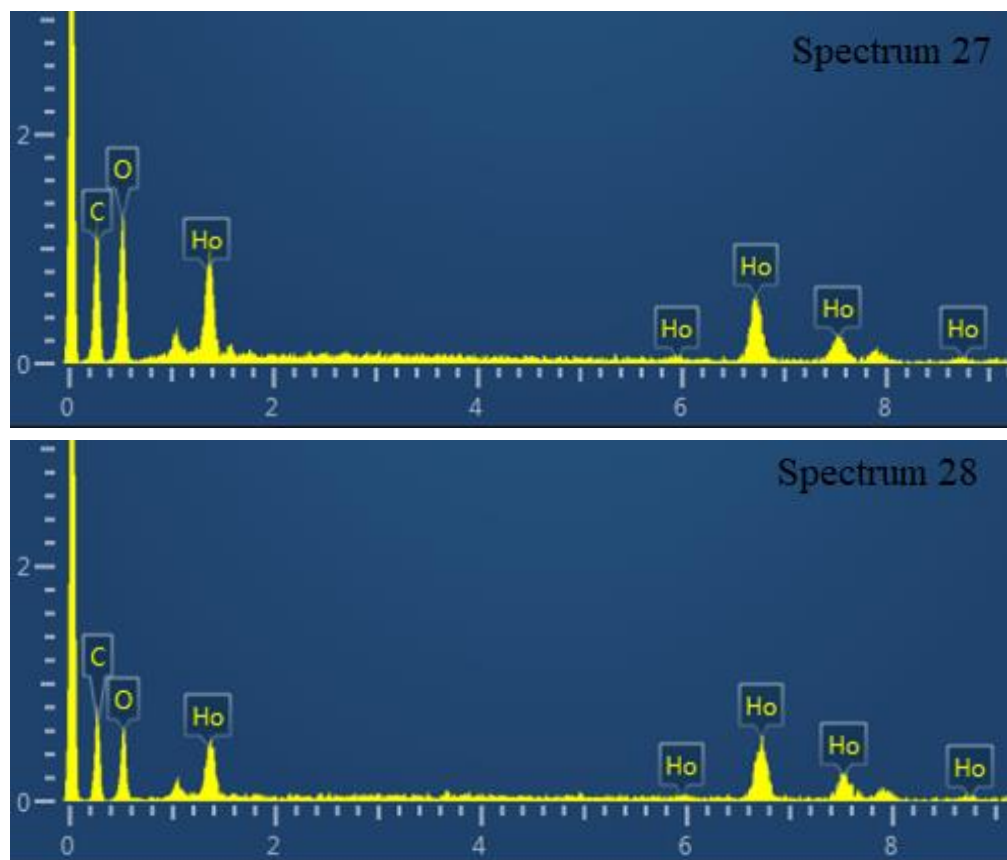

**Figure S8.** EDX spectra for SEM micrographs (presented in Figure 2) of Ho-1,4-H<sub>2</sub>bdc MOF.

The Ho-MOFs were studied by low temperature nitrogen adsorption. Figure S9 shows the nitrogen adsorption-desorption isotherm of Ho-MOFs.

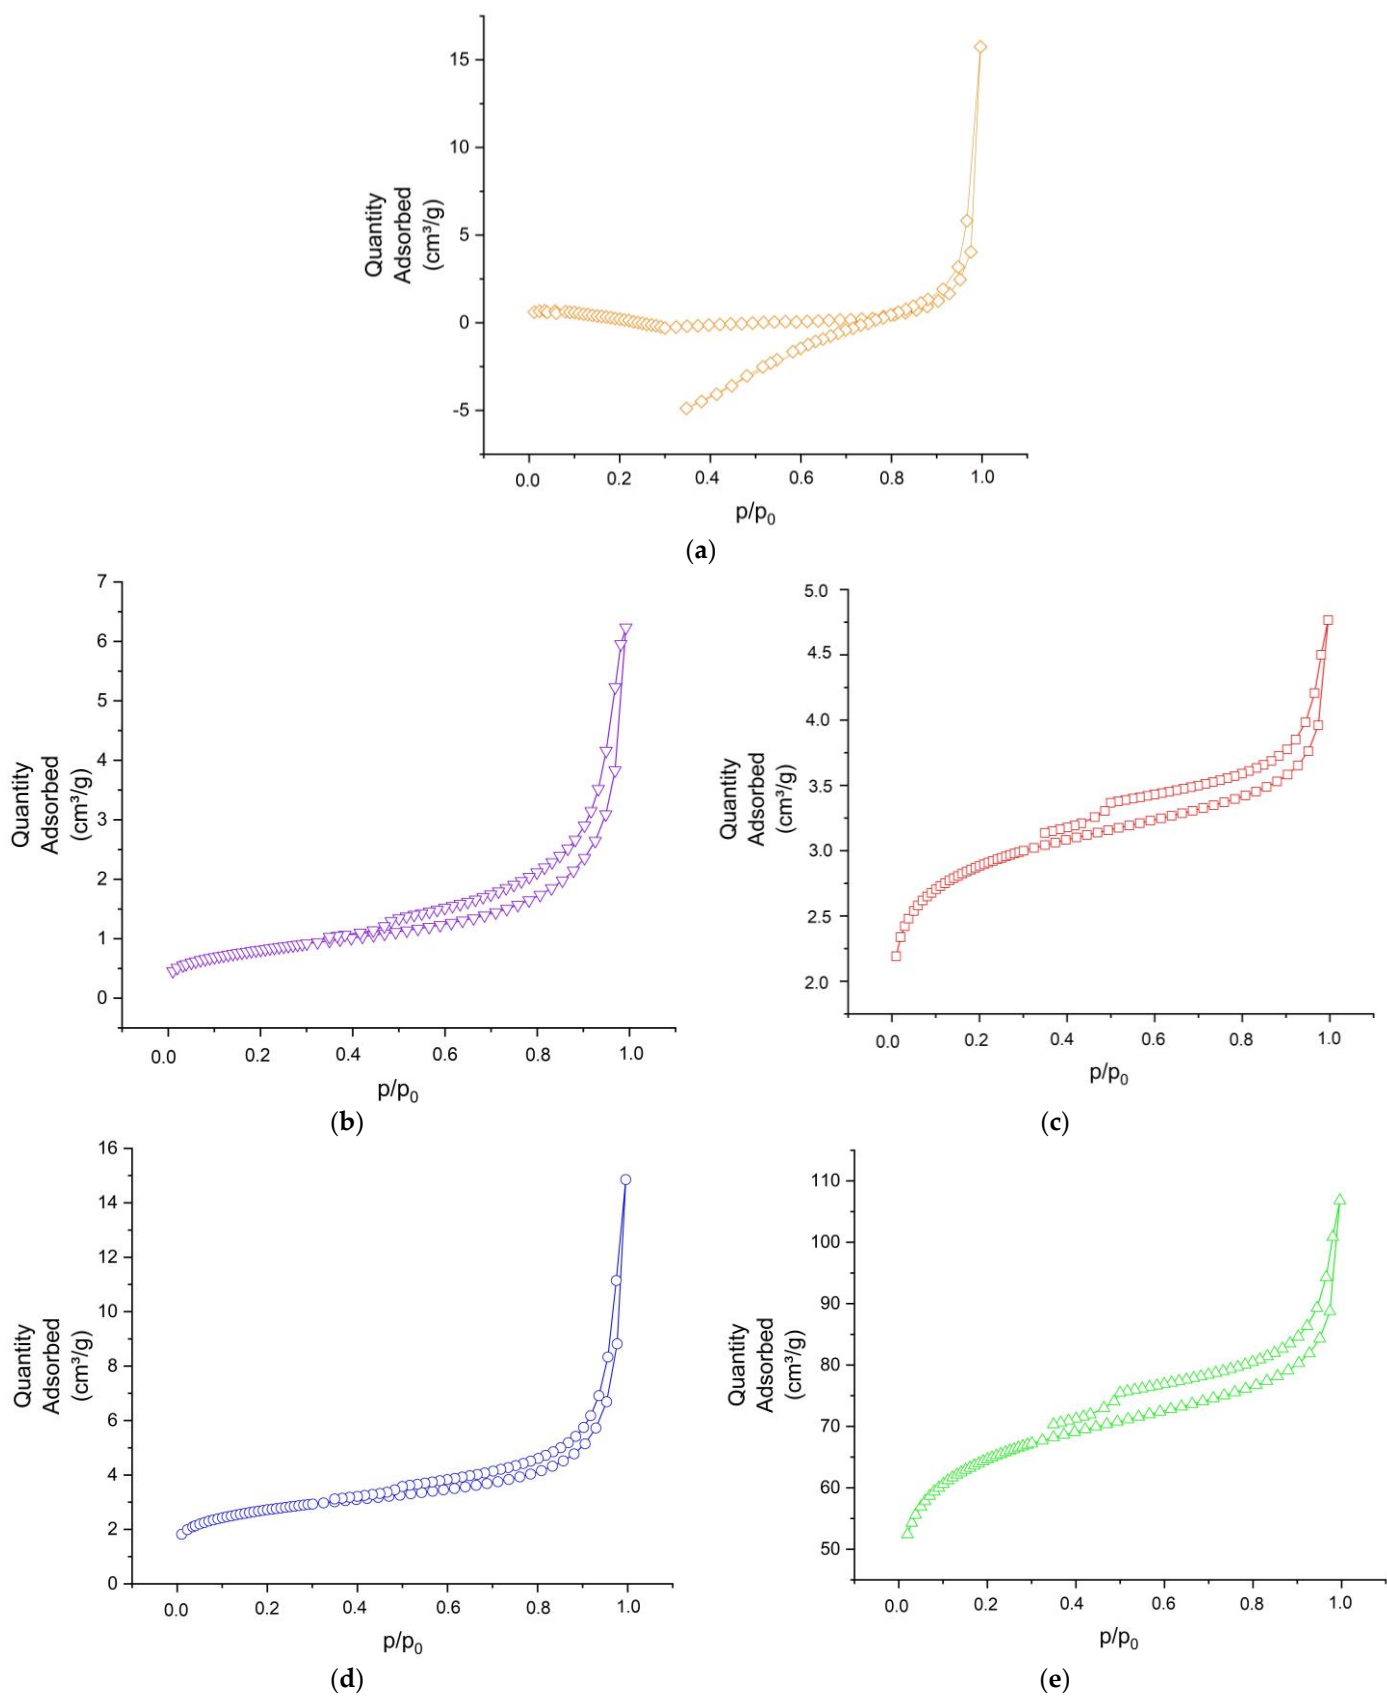

**Figure S9.** Nitrogen adsorption-desorption isotherm of Ho-MOF: (a) Ho-1,3,5-H<sub>3</sub>btc; (b) Ho-1,2,4-H<sub>3</sub>btc; (c) Ho-1,2-H<sub>2</sub>btc; (d) Ho-1,3-H<sub>2</sub>btc; (e) Ho-1,4-H<sub>2</sub>btc.

### S3. PEBA Investigation

The particle size of PEBA polymer was investigated by the method of dynamic light scattering. The molecular weight of PEBA polymer was studied by the analysis of static light scattering. Table S2 shows integrated light scattering intensity for the solvent (1-butanol) and the standard (toluene) at 445 nm and 25 °C.

**Table S2.** Integrated light scattering intensity for the solvent (1-butanol) and the standard (toluene) (445 nm, 25°C).

| $\Theta, ^\circ$ | 1-butanol |           | Toluene |            |
|------------------|-----------|-----------|---------|------------|
|                  | I         | St.D.I, % | I       | St.D. I, % |
| 40               | 32480     | 0.6       | 105111  | 0.4        |
| 50               | 24950     | 0.7       | 81820   | 0.5        |
| 60               | 20855     | 0.7       | 68881   | 0.4        |
| 70               | 18379     | 0.8       | 61046   | 0.6        |
| 80               | 17041     | 0.9       | 56302   | 0.6        |
| 90               | 16324     | 0.8       | 53932   | 0.5        |
| 100              | 16023     | 0.9       | 53152   | 0.5        |
| 110              | 16259     | 0.8       | 53796   | 0.4        |
| 120              | 17031     | 0.9       | 56423   | 0.5        |
| 130              | 18411     | 0.8       | 61047   | 0.4        |
| 140              | 20798     | 0.8       | 68893   | 0.4        |

Table S3 shows measured values used for the calculation of the physical parameters of the solvent (1-butanol) and of the standard (toluene) at 25 °C.

**Table S3.** Measured values used for the calculation of the physical parameters of the solvent (1-butanol) and of the standard (toluene) at 25 °C.

|           | $\rho, \text{g/cm}^3$ | $\eta, \text{mPa}\cdot\text{c}$ | $n_{436,4 \text{ nm}}$ | $n_{589,3 \text{ nm}}$ | $n_{657,2 \text{ nm}}$ |
|-----------|-----------------------|---------------------------------|------------------------|------------------------|------------------------|
| 1-butanol | 0.80842               | 2.9327                          | 1.405484               | 1.397054               | 1.395059               |
| Toluene   | -                     | -                               | 1.51459                | 1.49398                | 1.48950                |

Table S4 shows characteristic relaxation times of particle concentration fluctuations ( $\tau_1$ ) in the scattered volume (fast mode). Figure S10 shows plots of the reciprocal relaxation times of the particle concentration fluctuations ( $\tau_1$ ) versus the square of the wave vector and the dependence of the translational diffusion coefficients ( $D_{H1}$ ) on the concentration for the fast mode. Table S5 shows translation coefficient ( $D_{H1}$ ) and radius of equivalent sphere ( $R_{H1}$ ) corresponding to the fast mode.

**Table S4.** Characteristic relaxation times of particle concentration fluctuations ( $\tau_1$ ) in the scattered volume (fast mode).

| $C, \%$          |                            | 0.0994       | 0.0796 | 0.0598 | 0.0397 |
|------------------|----------------------------|--------------|--------|--------|--------|
| $\Theta, ^\circ$ | $q^2 \cdot 10^{14}, 1/m^2$ | $\tau_1, mc$ |        |        |        |
| 40               | 1.843                      | -            | 0.6770 | 0.4777 | 0.6130 |
| 50               | 2.814                      | 0.5643       | 0.4530 | 0.5430 | 0.4637 |
| 60               | 3.938                      | 0.2470       | 0.1930 | 0.4350 | 0.3843 |
| 70               | 5.182                      | 0.4013       | 0.1743 | 0.1743 | 0.3827 |
| 80               | 6.509                      | 0.2143       | 0.2143 | 0.1520 | 0.1547 |
| 90               | 7.876                      | 0.1497       | 0.2880 | 0.1155 | 0.2880 |
| 100              | 9.244                      | 0.1610       | 0.1633 | 0.1020 | -      |
| 110              | 10.57                      | 0.0867       | 0.1345 | 0.1350 | 0.1160 |
| 120              | 11.81                      | 0.1160       | 0.0770 | 0.0860 | 0.0900 |
| 130              | 12.94                      | 0.1350       | -      | -      | 0.0860 |

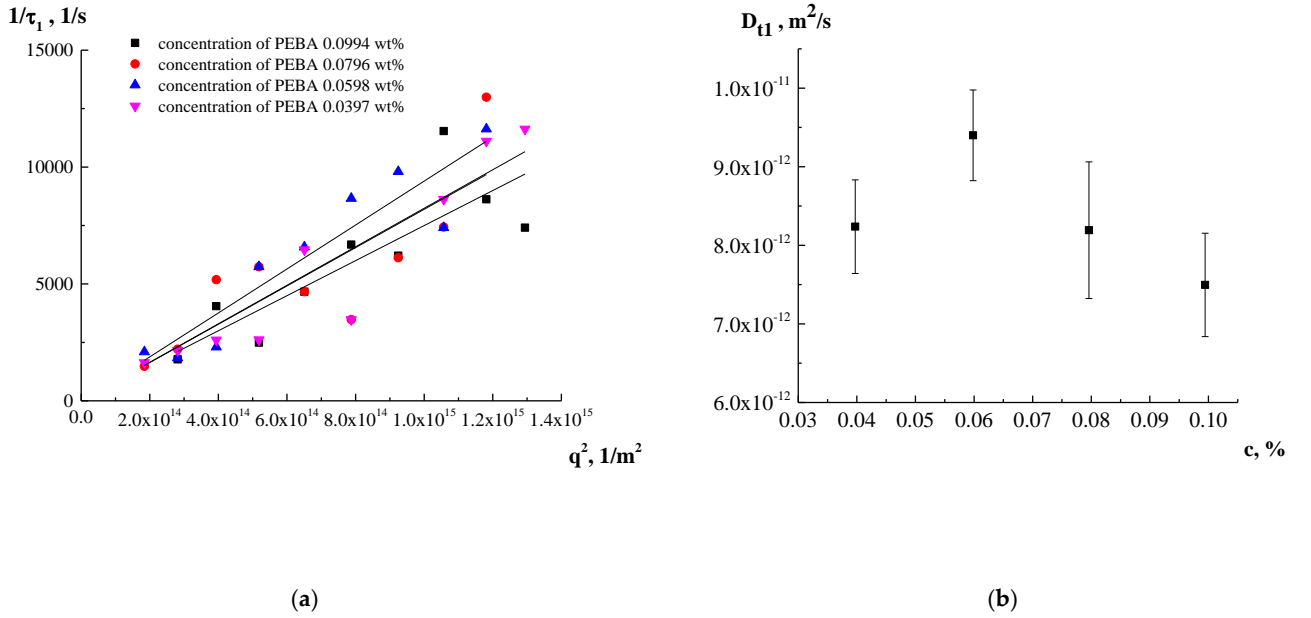

**Figure S10.** Plots (a) of the reciprocal relaxation times of the particle concentration fluctuations ( $\tau_1$ ) versus the square of the wave vector and (b) the dependence of the translational diffusion coefficients ( $D_{11}$ ) on the concentration for the fast mode.

**Table S5.** Translation coefficient ( $D_{t1}$ ) and radius of equivalent sphere ( $R_{h1}$ ) corresponding to the fast mode.

| $c, \%$              | $D_{t1} \cdot 10^{12}, \text{m}^2/\text{c}$ | St.D. $D_{t1} \cdot 10^{12}, \text{m}^2/\text{c}$ | $R_{h2}, \text{nm}$ | St.D. $R_{h2}, \text{nm}$ |
|----------------------|---------------------------------------------|---------------------------------------------------|---------------------|---------------------------|
| 0.0994               | 7.5                                         | 0.7                                               | 10                  | 1                         |
| 0.0796               | 8.2                                         | 0.9                                               | 9.1                 | 1.0                       |
| 0.0598               | 9.4                                         | 0.6                                               | 7.9                 | 0.5                       |
| 0.0397               | 8.2                                         | 0.6                                               | 9.0                 | 0.7                       |
| <b>average value</b> | <b>8</b>                                    | <b>1</b>                                          | <b>9</b>            | <b>1</b>                  |

Table S6 shows Characteristic relaxation times of particle concentration fluctuations ( $\tau_2$ ) in the scattered volume (slow mode). Figure S11 shows plot of reciprocal relaxation times of particle concentration fluctuations ( $\tau_2$ ) versus the square of the wave vector and plot of translational diffusion coefficients ( $D_{t2}$ ) versus concentration (right) for the slow mode. Table S7 shows Translational diffusion coefficient ( $D_{t2}$ ) and hydrodynamic radius of equivalent sphere ( $R_{h2}$ ) corresponding to the slow mode.

**Table S6.** Characteristic relaxation times of particle concentration fluctuations ( $\tau_2$ ) in the scattered volume (slow mode).

| $C, \%$          |                            | 0.0994       | 0.0796  | 0.0598  | 0.0397  |
|------------------|----------------------------|--------------|---------|---------|---------|
| $\Theta, ^\circ$ | $q^2 \cdot 10^{14}, 1/m^2$ | $\tau_2, mc$ |         |         |         |
| 40               | 1.843                      | -            | 12.6300 | 14.6900 | 12.6300 |
| 50               | 2.814                      | 9.3300       | 8.0200  | 8.0200  | 8.0200  |
| 60               | 3.938                      | 5.9260       | 5.9260  | 5.9260  | 5.6487  |
| 70               | 5.182                      | 4.3790       | 4.3790  | 4.1743  | 3.9697  |
| 80               | 6.509                      | 3.2360       | 3.2360  | 3.2360  | 2.9333  |
| 90               | 7.876                      | 2.7820       | 3.0847  | 2.5213  | 2.5213  |
| 100              | 9.244                      | 2.3910       | 2.2980  | 2.0560  | 2.0560  |
| 110              | 10.57                      | 2.0560       | 2.0560  | 2.0560  | -       |
| 120              | 11.81                      | 1.7670       | 1.7670  | 1.7670  | 1.5190  |
| 130              | 12.94                      | 1.7670       | 1.4480  | 1.3770  | 1.5190  |
| 140              | 13.91                      | 1.4480       | 1.5190  | 1.3060  | 1.3060  |

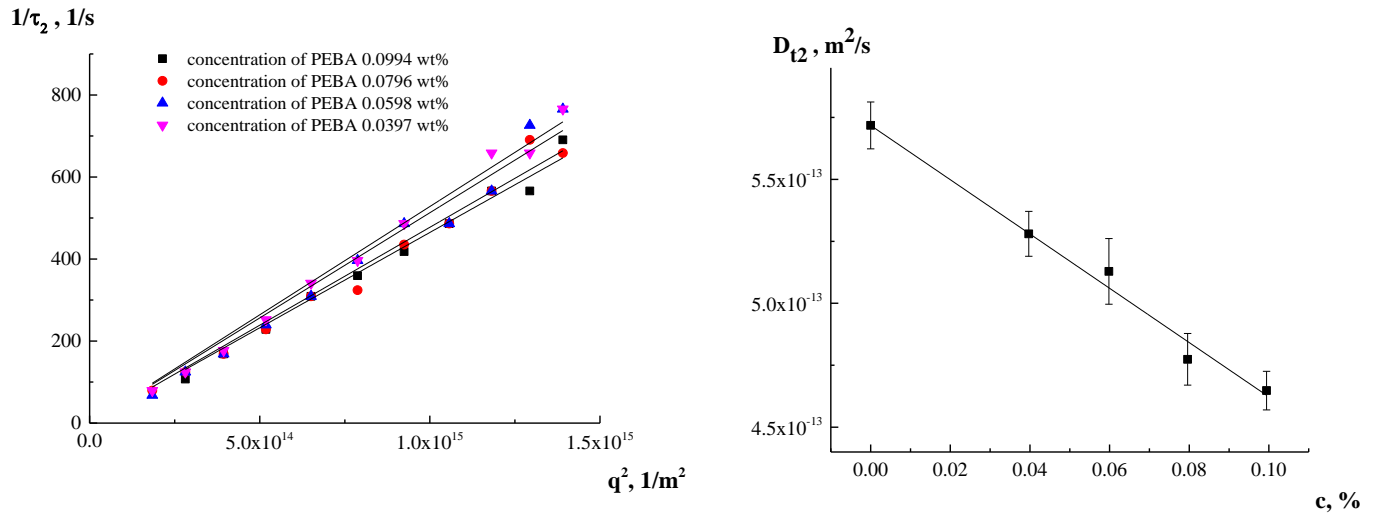

(a)

(b)

**Figure S11.** (a) Plot of reciprocal relaxation times of particle concentration fluctuations ( $\tau_2$ ) versus the square of the wave vector and (b) plot of translational diffusion coefficients ( $D_{t2}$ ) versus concentration (right) for the slow mode.



**Table S7.** Translational diffusion coefficient ( $D_{t2}$ ) and hydrodynamic radius of equivalent sphere ( $R_{h2}$ ) corresponding to the slow mode.

| c, %                                                  | D <sub>ti</sub> *10 <sup>12</sup> , m <sup>2</sup> /c | St.D. D <sub>ti</sub> *10 <sup>12</sup> ,<br>m <sup>2</sup> /c | R <sub>h2</sub> , nm | St.D. R <sub>h2</sub> , nm |
|-------------------------------------------------------|-------------------------------------------------------|----------------------------------------------------------------|----------------------|----------------------------|
| 0.0994                                                | 0.46                                                  | 0.01                                                           | 160                  | 3                          |
| 0.0796                                                | 0.48                                                  | 0.01                                                           | 156                  | 3                          |
| 0.0598                                                | 0.51                                                  | 0.01                                                           | 145                  | 4                          |
| 0.0397                                                | 0.53                                                  | 0.01                                                           | 141                  | 2                          |
| Result of the extrapolation to the zero concentration |                                                       |                                                                |                      |                            |
|                                                       | 0.57                                                  | 0.02                                                           | 130                  | 5                          |

Table S8 shows integrated intensity of the light scattering for polymer solutions and its standard deviation.

**Table S8.** Integrated intensity of the light scattering ( $I$ ) for polymer solutions and its standard deviation (St.D.  $I$ ).

| $C, \%$          | 0.0994 | 0.0796 | 0.0598 | 0.0397 | 0.0994        | 0.0796 | 0.0598 | 0.0397 |
|------------------|--------|--------|--------|--------|---------------|--------|--------|--------|
| $\Theta, ^\circ$ | $I$    |        |        |        | St.D. $I, \%$ |        |        |        |
| 40               | -      | 929429 | 697851 | 388315 | -             | 11     | 12     | 11     |
| 50               | 625753 | 497455 | 372282 | 217004 | 8             | 9      | 9      | 8      |
| 60               | 389097 | 309174 | 229211 | 141521 | 6             | 6      | 7      | 5      |
| 70               | 274854 | 220204 | 167561 | 103073 | 5             | 5      | 5      | 5      |
| 80               | 209991 | 166008 | 129202 | 81302  | 4             | 5      | 4      | 4      |
| 90               | 171304 | 134837 | 106163 | 68558  | 4             | 3      | 4      | 3      |
| 100              | 147543 | 118916 | 93010  | 60937  | 3             | 3      | 3      | 2      |
| 110              | 135707 | 110010 | 84877  | 57494  | 2             | 2      | 2      | 2      |
| 120              | 132537 | 107357 | 83839  | 57418  | 2             | 2      | 3      | 2      |
| 130              | 137737 | 111989 | 88637  | 60667  | 2             | 2      | 2      | 2      |
| 140              | 152093 | 124289 | 98473  | 68475  | 2             | 2      | 2      | 1      |

Relative and reduced viscosity of PEBA were investigated at different temperature: at 10 °C (Table S9), at 20 °C (Table S10), at 25 °C (Table S11), at 30 °C (Table S12), at 40 °C (Table S13), at 50 °C (Table S14).

**Table S9.** Results of measurement of relative and reduced viscosity at 10 °C.

| <b>c, g/dL</b>       | <b>t, c</b>                                 | <b>t/t<sub>0</sub></b>    | <b>(t/t<sub>0</sub>-1)/c, dL/g</b> | <b>ln(t/t<sub>0</sub>)/c, dL/g</b> |
|----------------------|---------------------------------------------|---------------------------|------------------------------------|------------------------------------|
| <i>concentration</i> | <i>rolling time of the ball in solution</i> | <i>relative viscosity</i> | <i>Huggins</i>                     | <i>Kramer</i>                      |
| 0                    | 92.77                                       |                           | -                                  |                                    |
| 2                    | 278.44                                      | 3.00                      | 1.0007                             | 0.5495                             |
| 0.747                | 143.43                                      | 1.55                      | 0.7311                             | 0.5833                             |
| 0.622                | 133.74                                      | 1.44                      | 0.7100                             | 0.5880                             |
| 0.502                | 125.12                                      | 1.35                      | 0.6946                             | 0.5959                             |
| 0.350                | 114.47                                      | 1.23                      | 0.6685                             | 0.6007                             |

**Table S10.** Results of measurement of relative and reduced viscosity at 20 °C.

| <b>c, g/dL</b>       | <b>t, c</b>                                 | <b>t/t<sub>0</sub></b>    | <b>(t/t<sub>0</sub>-1)/c, dL/g</b> | <b>ln(t/t<sub>0</sub>)/c, dL/g</b> |
|----------------------|---------------------------------------------|---------------------------|------------------------------------|------------------------------------|
| <i>concentration</i> | <i>rolling time of the ball in solution</i> | <i>relative viscosity</i> | <i>Huggins</i>                     | <i>Kramer</i>                      |
| 0                    | 70.02                                       |                           | -                                  |                                    |
| 2                    | 206.63                                      | 2.95                      | 0.9754                             | 0.5410                             |
| 0.747                | 107.73                                      | 1.54                      | 0.7209                             | 0.5767                             |
| 0.622                | 100.58                                      | 1.44                      | 0.7016                             | 0.5822                             |
| 0.502                | 94.12                                       | 1.34                      | 0.6855                             | 0.5891                             |
| 0.350                | 86.25                                       | 1.23                      | 0.6623                             | 0.5956                             |

**Table S11.** Results of measurement of relative and reduced viscosity at 25 °C.

| <b>c, g/dL</b>       | <b>t, c</b>                                 | <b>t/t<sub>0</sub></b>    | <b>(t/t<sub>0</sub>-1)/c, dL/g</b> | <b>ln(t/t<sub>0</sub>)/c, dL/g</b> |
|----------------------|---------------------------------------------|---------------------------|------------------------------------|------------------------------------|
| <i>concentration</i> | <i>rolling time of the ball in solution</i> | <i>relative viscosity</i> | <i>Huggins</i>                     | <i>Kramer</i>                      |
| 0                    | 61.28                                       |                           | -                                  |                                    |
| 2                    | 179.41                                      | 2.93                      | 0.9639                             | 0.5371                             |
| 0.747                | 94.13                                       | 1.54                      | 0.7176                             | 0.5746                             |
| 0.622                | 87.88                                       | 1.43                      | 0.6978                             | 0.5795                             |
| 0.502                | 82.29                                       | 1.34                      | 0.6828                             | 0.5871                             |
| 0.350                | 75.44                                       | 1.23                      | 0.6602                             | 0.5939                             |

**Table S12.** Results of measurement of relative and reduced viscosity at 30 °C.

| c, g/dL              | t, c                                        | t/t <sub>0</sub>          | (t/t <sub>0</sub> -1)/c, dL/g | ln(t/t <sub>0</sub> )/c, dL/g |
|----------------------|---------------------------------------------|---------------------------|-------------------------------|-------------------------------|
| <i>concentration</i> | <i>rolling time of the ball in solution</i> | <i>relative viscosity</i> | <i>Huggins</i>                | <i>Kramer</i>                 |
| 0                    | 53.91                                       |                           | -                             |                               |
| 2                    | 156.63                                      | 2.91                      | 0.9528                        | 0.5333                        |
| 0.747                | 82.54                                       | 1.53                      | 0.7110                        | 0.5703                        |
| 0.622                | 77.19                                       | 1.43                      | 0.6942                        | 0.5771                        |
| 0.502                | 72.29                                       | 1.34                      | 0.6792                        | 0.5844                        |
| 0.350                | 66.30                                       | 1.23                      | 0.6568                        | 0.5912                        |

**Table S13.** Results of measurement of relative and reduced viscosity at 40 °C.

| c, g/dL              | t, c                                        | t/t <sub>0</sub>          | (t/t <sub>0</sub> -1)/c, dL/g | ln(t/t <sub>0</sub> )/c, dL/g |
|----------------------|---------------------------------------------|---------------------------|-------------------------------|-------------------------------|
| <i>concentration</i> | <i>rolling time of the ball in solution</i> | <i>relative viscosity</i> | <i>Huggins</i>                | <i>Kramer</i>                 |
| 0                    | 42.19                                       |                           | -                             |                               |
| 2                    | 121.12                                      | 2.87                      | 0.9355                        | 0.5273                        |
| 0.747                | 64.43                                       | 1.53                      | 0.7059                        | 0.5670                        |
| 0.622                | 60.26                                       | 1.43                      | 0.6887                        | 0.5732                        |
| 0.502                | 56.44                                       | 1.34                      | 0.6732                        | 0.5799                        |
| 0.350                | 51.83                                       | 1.23                      | 0.6529                        | 0.5881                        |

**Table S14.** Results of measurement of relative and reduced viscosity at 50 °C.

| c, g/dL              | t, c                                        | t/t <sub>0</sub>          | (t/t <sub>0</sub> -1)/c, dL/g | ln(t/t <sub>0</sub> )/c, dL/g |
|----------------------|---------------------------------------------|---------------------------|-------------------------------|-------------------------------|
| <i>concentration</i> | <i>rolling time of the ball in solution</i> | <i>relative viscosity</i> | <i>Huggins</i>                | <i>Kramer</i>                 |
| 0                    | 33.56                                       |                           | -                             |                               |
| 2                    | 95.23                                       | 2.84                      | 0.9188                        | 0.5215                        |
| 0.747                | 51.06                                       | 1.52                      | 0.6979                        | 0.5617                        |
| 0.622                | 47.79                                       | 1.42                      | 0.6818                        | 0.5684                        |
| 0.502                | 44.80                                       | 1.33                      | 0.6672                        | 0.5754                        |
| 0.350                | 41.17                                       | 1.23                      | 0.6476                        | 0.5837                        |

#### S4. PEBA/Ho-MOFs Investigation

The surface of developed PEBA/Ho-MOFs membranes was studied using a light microscope. The optical micrographs for PEBA/Ho-MOFs membranes are presented in Figure S12.

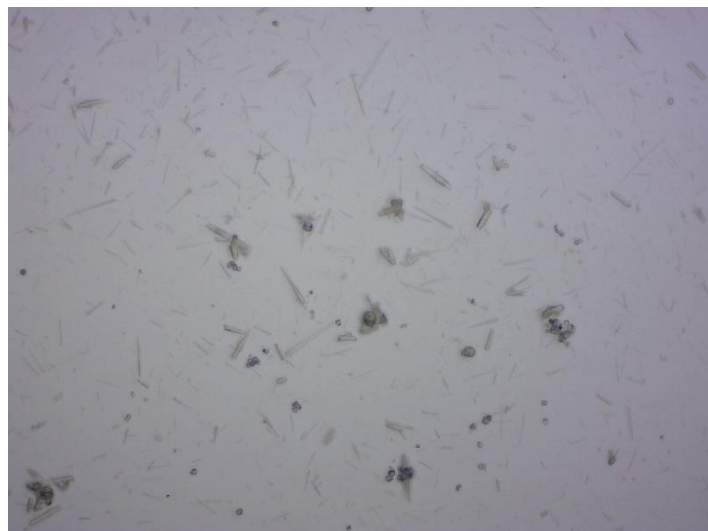

(a)

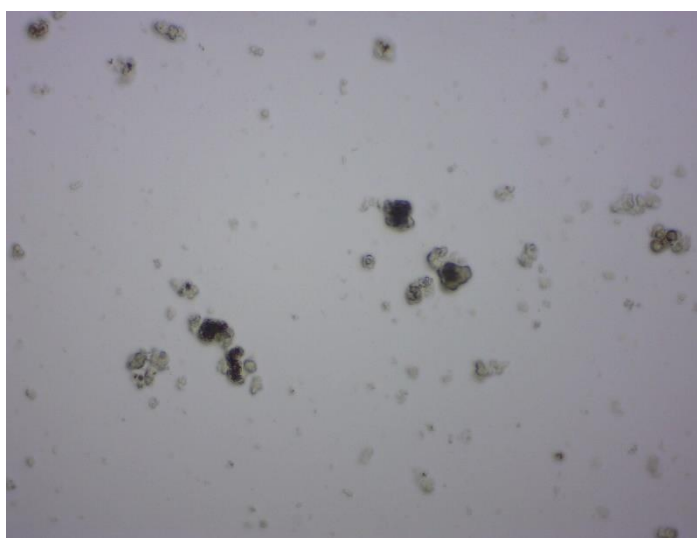

(b)

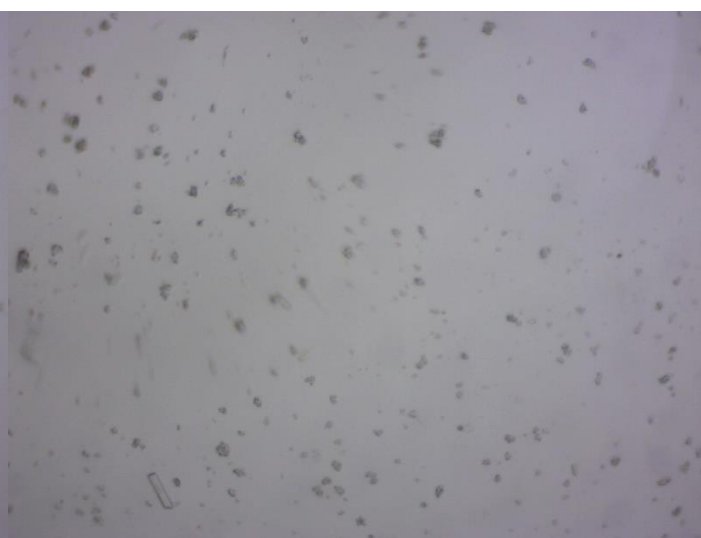

(c)

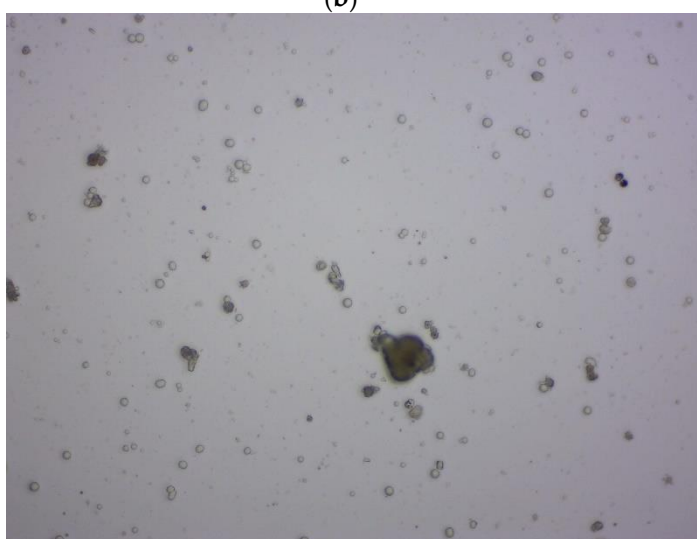

(d)

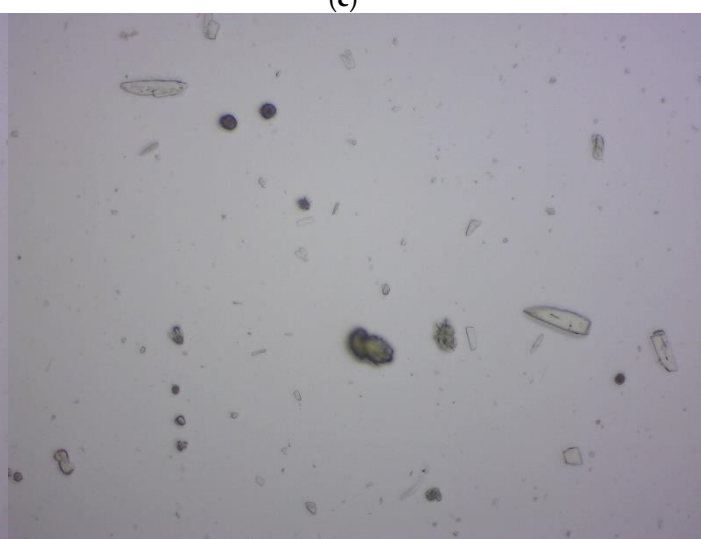

(e)

**Figure S12.** Optical micrographs for PEBA/Ho-MOFs membranes: (a) PEBA/Ho-1,3,5-H<sub>3</sub>btc; (b) PEBA/Ho-1,2,4-H<sub>3</sub>btc; (c) PEBA/Ho-1,2-H<sub>2</sub>bdc; (d) PEBA/Ho-1,3-H<sub>2</sub>bdc; (e) PEBA/Ho-1,4-H<sub>2</sub>bdc.

---

## References

1. Singha, D.K.; Majee, P.; Mondal, S.K.; Mahata, P. Detection of pesticide using the large stokes shift of luminescence of a mixed lanthanide co-doped metal–organic framework. *Polyhedron* **2019**, *158*, 277–282, doi:10.1016/j.poly.2018.10.066.
2. Fröhlich, D.; Pantatosaki, E.; Kolokathis, P.D.; Markey, K.; Reinsch, H.; Baumgartner, M.; van der Veen, M.A.; De Vos, D.E.; Stock, N.; Papadopoulos, G.K.; et al. Water adsorption behaviour of CAU-10-H: a thorough investigation of its structure–property relationships. *J. Mater. Chem. A* **2016**, *4*, 11859–11869, doi:10.1039/C6TA01757F.
3. Almáši, M.; Zeleňák, V.; Kuchár, J.; Bourrelly, S.; Llewellyn, P.L. New members of MOF-76 family containing Ho(III) and Tm(III) ions: Characterization, stability and gas adsorption properties. *Colloids Surfaces A Physicochem. Eng. Asp.* **2016**, *496*, 114–124, doi:10.1016/j.colsurfa.2015.10.048.
